# Supplementary material for: Intra Articular Injection of Autologous Microfat and Platelets-Rich Plasma in the Treatment of Wrist Osteoarthritis: A Pilot Study
Source: MDPI journal article supplement (doi:10.3390/jcm11195786), 2022-09-29
Supplement: s1 [file s1]

# Supplementary Materials

**Supplementary Table S1.** Patient-related Outcomes over the 12 months post treatment

|                               | Mean $\pm$ SD or n (%) | Mean Change<br>$\pm$ SD | Median Change (min – max) | Adjusted<br>p-value |
|-------------------------------|------------------------|-------------------------|---------------------------|---------------------|
| PAIN VAS                      |                        |                         |                           |                     |
| Baseline                      | 58.3 $\pm$ 13.2        |                         |                           |                     |
| 1 months                      | 35.8 $\pm$ 17.3        | -22.5 $\pm$ 19          | -20 (-57 – 0)             | 0.008               |
| 3 months                      | 32.7 $\pm$ 13.4        | -25.6 $\pm$ 14.7        | -20 (-49 – 0)             | 0.003               |
| 6 months                      | 25.4 $\pm$ 11.4        | -32.8 $\pm$ 12.9        | -30 (-50 – -15)           | 0.002               |
| 12 months                     | 25.8 $\pm$ 15.2        | -32.4 $\pm$ 17.8        | -32.5 (-64 – 0)           | 0.003               |
| Pain VAS MCID 14 points       |                        |                         |                           |                     |
| 1 months                      | 8 (66.7)               |                         |                           | 0.248               |
| 3 months                      | 10 (83.3)              |                         |                           | 0.021               |
| 6 months                      | 12 (100)               |                         |                           | <0.001              |
| 12 months                     | 11 (91.7)              |                         |                           | 0.004               |
| Pain VAS > 30 points          |                        |                         |                           |                     |
| 1 months                      | 4 (33.3)               |                         |                           | 0.248               |
| 3 months                      | 4 (33.3)               |                         |                           | 0.248               |
| 6 months                      | 8 (66.7)               |                         |                           | 0.248               |
| 12 months                     | 7 (58.3)               |                         |                           | 0.564               |
| DASH                          |                        |                         |                           |                     |
| Baseline                      | 44.5 $\pm$ 15.3        |                         |                           |                     |
| 3 months                      | 30.3 $\pm$ 15.8        | -14.2 $\pm$ 12          | -11.3 (-39.2 – 2.4)       | 0.002               |
| 6 months                      | 27.3 $\pm$ 14.4        | -17.2 $\pm$ 12.6        | -17.9 (-39.2 – 5.7)       | 0.002               |
| 12 months                     | 24.1 $\pm$ 16.6        | -20.4 $\pm$ 11.8        | -23 (-35 – -0.1)          | 0.002               |
| DASH responder (10.83 points) |                        |                         |                           |                     |
| 3 months                      | 7 (58.3)               |                         |                           | 0.564               |
| 6 months                      | 10 (83.3)              |                         |                           | 0.021               |
| 12 months                     | 9 (75)                 |                         |                           | 0.083               |
| PRWE                          |                        |                         |                           |                     |
| Baseline                      | 62 $\pm$ 19.1          |                         |                           |                     |
| 3 months                      | 32.8 $\pm$ 17          | -29.2 $\pm$ 17.9        | -25 (-67.5 – -8)          | 0.001               |

|                                                                                                                                                                |             |              |                     |       |
|----------------------------------------------------------------------------------------------------------------------------------------------------------------|-------------|--------------|---------------------|-------|
| 6 months                                                                                                                                                       | 29.5 ± 16.6 | -32.4 ± 21.2 | -29.8 (-67.5 – 1.5) | 0.002 |
| 12 months                                                                                                                                                      | 26.3 ± 20.8 | -35.7 ± 19.5 | -32.5 (-67 – -7.5)  | 0.001 |
| PRWE responder (11.5 points)                                                                                                                                   |             |              |                     |       |
| 3 months                                                                                                                                                       | 11 (91.7)   |              |                     | 0.012 |
| 6 months                                                                                                                                                       | 10 (83.3)   |              |                     | 0.021 |
| 12 months                                                                                                                                                      | 11 (91.7)   |              |                     | 0.012 |
| Median of absolute change from baseline. Adjusted P value: Wilcoxon signed rank test with Stepdown Bonferroni correction. Test of Binomial proportion (p=0.5). |             |              |                     |       |

**Supplementary Table S2:** Clinical measures over the 12 months post treatment.

|                                      |           | Mean ± SD   | Mean Change ± SD | Median Change (min – max) | Adjusted p-value |
|--------------------------------------|-----------|-------------|------------------|---------------------------|------------------|
| Wrist strength (kg)<br>injured wrist | Baseline  | 25.9 ± 9.6  |                  |                           |                  |
|                                      | 3 months  | 29.8 ± 10.7 | 3.9 ± 2.9        | 4.2 (-1 – 8.7)            | 0.005            |
|                                      | 6 months  | 33.4 ± 12.3 | 7.5 ± 6.7        | 7.7 (-2.3 – 20)           | 0.005            |
|                                      | 12 months | 34.2 ± 12.4 | 8.3 ± 6.9        | 7.3 (0.7 – 24)            | 0.002            |
| normal wrist                         | Baseline  | 38.8 ± 12.8 |                  |                           |                  |
|                                      | 3 months  | 41.4 ± 12.5 | 2.6 ± 4.4        | 1.3 (-3.3 – 13.3)         | 0.054            |
|                                      | 6 months  | 42.7 ± 13.5 | 3.9 ± 5.7        | 4.7 (-8.7 – 12.7)         | 0.054            |
|                                      | 12 months | 44.2 ± 12.7 | 5.4 ± 4.9        | 2.7 (-1.3 – 15.3)         | 0.032            |
| Extension (°)<br>injured wrist       | Baseline  | 40.3 ± 12.4 |                  |                           |                  |
|                                      | 3 months  | 35.8 ± 9.6  | -4.4 ± 8.6       | -3 (-24 – 6)              | 0.404            |
|                                      | 6 months  | 40 ± 11.6   | -0.3 ± 10.1      | 2 (-26 – 14)              | 0.945            |
|                                      | 12 months | 39.8 ± 9.3  | -0.4 ± 6.2       | 0 (-14 – 10)              | 0.945            |
| normal wrist                         | Baseline  | 64.3 ± 16.5 |                  |                           |                  |
|                                      | 3 months  | 61.8 ± 14.7 | -2.4 ± 15.8      | -0.5 (-30 – 22)           | 0.756            |
|                                      | 6 months  | 60.3 ± 13   | -3.9 ± 13.4      | -1.5 (-40 – 10)           | 0.756            |
|                                      | 12 months | 60.2 ± 17.9 | -4.1 ± 20.3      | -1 (-62 – 20)             | 0.756            |

|                        |               |           |             |             |                |       |
|------------------------|---------------|-----------|-------------|-------------|----------------|-------|
| Flexion (°)            | injured wrist | Baseline  | 33.8 ± 10.5 |             |                |       |
|                        |               | 3 months  | 36.8 ± 14.7 | 2.9 ± 11.9  | 3 (-15 – 32)   | 0.973 |
|                        |               | 6 months  | 37.5 ± 9.4  | 3.7 ± 10.9  | 2 (-18 – 20)   | 0.750 |
|                        |               | 12 months | 33.4 ± 13.8 | -0.4 ± 9.8  | -1 (-19 – 14)  | 0.973 |
|                        | normal wrist  | Baseline  | 55.8 ± 9.9  |             |                |       |
|                        |               | 3 months  | 59.3 ± 15.5 | 3.6 ± 13.9  | 1 (-17 – 40)   | 0.875 |
|                        |               | 6 months  | 55.3 ± 8.2  | -0.4 ± 6.9  | 0 (-9 – 14)    | 0.875 |
|                        |               | 12 months | 52.5 ± 12.3 | -3.3 ± 13.3 | -2 (-37 – 18)  | 0.875 |
| Ulnar inclination (°)  | injured wrist | Baseline  | 15.9 ± 7.1  |             |                |       |
|                        |               | 3 months  | 20 ± 4.7    | 4.1 ± 7.9   | 3.5 (-10 – 18) | 0.106 |
|                        |               | 6 months  | 23.8 ± 4.7  | 7.9 ± 8.4   | 8 (-10 – 22)   | 0.031 |
|                        |               | 12 months | 22.5 ± 6.4  | 6.6 ± 7.2   | 7 (-6 – 18)    | 0.031 |
|                        | normal wrist  | Baseline  | 31.9 ± 11.1 |             |                |       |
|                        |               | 3 months  | 30.2 ± 6.5  | -1.8 ± 9.6  | -2 (-20 – 16)  | 0.999 |
|                        |               | 6 months  | 31.8 ± 10.2 | -0.1 ± 12.2 | -4 (-18 – 20)  | 0.999 |
|                        |               | 12 months | 28.7 ± 9.4  | -3.3 ± 10.3 | -3 (-20 – 14)  | 0.999 |
| Radial inclination (°) | injured wrist | Baseline  | 12.2 ± 3.6  |             |                |       |
|                        |               | 3 months  | 16.7 ± 5.6  | 4.5 ± 6.1   | 4 (-8 – 17)    | 0.077 |
|                        |               | 6 months  | 14.7 ± 5.2  | 2.5 ± 4.6   | 1.5 (-6 – 10)  | 0.195 |
|                        |               | 12 months | 13.9 ± 6.9  | 1.8 ± 6.4   | 0.5 (-6 – 13)  | 0.561 |
|                        | normal wrist  | Baseline  | 23.4 ± 9    |             |                |       |
|                        |               | 3 months  | 23.5 ± 8.1  | 0.1 ± 9.7   | 0 (-12 – 20)   | 0.896 |
|                        |               | 6 months  | 24 ± 7.9    | 0.6 ± 11.7  | 1 (-20 – 23)   | 0.896 |
|                        |               | 12 months | 24 ± 8.7    | 0.6 ± 12    | 0 (-18 – 22)   | 0.896 |

Median of absolute change from baseline. Adjusted P value: Wilcoxon signed rank test with Stepdown Bonferroni correction.

**Supplementary Table S3.** Patient-related Outcomes over the 12 months post treatment by localization

| Supplementary Table S3: Patient-Related Outcomes over the 12 months post-treatment by localization |           |                                   |                       |                              |                     |                       |                     |                              |                           |
|----------------------------------------------------------------------------------------------------|-----------|-----------------------------------|-----------------------|------------------------------|---------------------|-----------------------|---------------------|------------------------------|---------------------------|
|                                                                                                    |           | RC patient n=8                    |                       | Test of Change from baseline |                     | RC+MC patients n=4    |                     |                              | Comparison Between groups |
|                                                                                                    |           | Mean ± SD or Mean Change<br>n (%) | Median Change<br>± SD | Median Change<br>(min – max) | Adjusted<br>p-value | Mean ± SD<br>or n (%) | Mean Change<br>± SD | Median Change<br>(min – max) | Adjusted<br>p-value       |
| PAIN VAS                                                                                           |           |                                   |                       |                              |                     |                       |                     |                              |                           |
|                                                                                                    | Baseline  | 57.5 ± 13.9                       |                       |                              |                     | 59.8 ± 13.7           |                     |                              |                           |
|                                                                                                    | 1 months  | 32.1 ± 18.4                       | -25.4 ± 14.8          | -22 ( -49 - 0)               | 0.047               | 43 ± 14               | -19.8 ± 28.1        | -29.5 ( -40 - 20)            | 0.343                     |
|                                                                                                    | 3 months  | 32.8 ± 16.5                       | -24.8 ± 15.8          | -24.5 ( -49 - 0)             | 0.047               | 32.5 ± 5              | -16.8 ± 27.2        | -5 ( -57 - 0)                | 1.000                     |
|                                                                                                    | 6 months  | 21.9 ± 12.5                       | -35.6 ± 11            | -35 ( -50 - -20)             | 0.039               | 32.5 ± 2.9            | -27.3 ± 14.5        | -20 ( -49 - -20)             | 0.303                     |
|                                                                                                    | 12 months | 23.8 ± 16                         | -33.8 ± 13.4          | -35 ( -51 - -19)             | 0.039               | 30 ± 14.7             | -27.3 ± 16.1        | -22.5 ( -49 - -15)           | 0.797                     |
| Pain VAS MCID 14 points                                                                            |           |                                   |                       |                              |                     |                       |                     |                              |                           |
|                                                                                                    | 1 months  | 7 (87.5)                          |                       |                              |                     | 1 (25)                |                     |                              | 0.200                     |
|                                                                                                    | 3 months  | 6 (75)                            |                       |                              |                     | 4 (100)               |                     |                              | 0.667                     |
|                                                                                                    | 6 months  | 8 (100)                           |                       |                              |                     | 4 (100)               |                     |                              | NA                        |
|                                                                                                    | 12 months | 8 (100)                           |                       |                              |                     | 3 (75)                |                     |                              | 0.667                     |
| Pain VAS > 30 points                                                                               |           |                                   |                       |                              |                     |                       |                     |                              |                           |
|                                                                                                    | 1 months  | 3 (37.5)                          |                       |                              |                     | 1 (25)                |                     |                              | 1.000                     |
|                                                                                                    | 3 months  | 3 (37.5)                          |                       |                              |                     | 1 (25)                |                     |                              | 1.000                     |
|                                                                                                    | 6 months  | 6 (75)                            |                       |                              |                     | 2 (50)                |                     |                              | 1.000                     |
|                                                                                                    | 12 months | 5 (62.5)                          |                       |                              |                     | 2 (50)                |                     |                              |                           |

| RC patient n=8                |                                   |                     |                              | Test of<br>Change<br>from<br>baseline | RC+MC patients<br>n=4 |                     |                              | Comparison<br>Between<br>groups |
|-------------------------------|-----------------------------------|---------------------|------------------------------|---------------------------------------|-----------------------|---------------------|------------------------------|---------------------------------|
|                               | Mean ± SD or Mean Change<br>n (%) | Mean Change<br>± SD | Median Change<br>(min – max) | Adjusted<br>p-value                   | Mean ± SD<br>or n (%) | Mean Change<br>± SD | Median Change<br>(min – max) | Adjusted<br>p-value             |
| DASH                          |                                   |                     |                              |                                       |                       |                     |                              |                                 |
| Baseline                      | 44.4 ± 16.6                       |                     |                              |                                       | 44.6 ± 14.6           |                     |                              |                                 |
| 3 months                      | 29.9 ± 19.5                       | -14.5 ± 12.9        | -9.6 ( -39.2 - -3.3)         | 0.023                                 | 31 ± 5.1              | -13.6 ± 11.8        | -17.1 ( -22.5 - 2.4)         | 0.932                           |
| 6 months                      | 24 ± 15.7                         | -20.4 ± 12.4        | -20.4 ( -39.2 - 0.8)         | 0.023                                 | 34 ± 9.9              | -10.7 ± 11.7        | -13.8 ( -20.8 - 5.7)         | 0.234                           |
| 12 months                     | 22 ± 19.1                         | -22.4 ± 12.4        | -26.7 ( -35 - -3.3)          | 0.023                                 | 28.3 ± 11.2           | -16.3 ± 11.1        | -20.4 ( -24.2 - -0.1)        | 0.350                           |
| DASH responder (10.83 points) |                                   |                     |                              |                                       |                       |                     |                              |                                 |
| 3 months                      | 4 (50)                            |                     |                              |                                       | 3 (75)                |                     |                              | 1.000                           |
| 6 months                      | 7 (87.5)                          |                     |                              |                                       | 3 (75)                |                     |                              | 1.000                           |
| 12 months                     | 6 (75)                            |                     |                              |                                       | 3 (75)                |                     |                              | 1.000                           |
| PRWE                          |                                   |                     |                              |                                       |                       |                     |                              |                                 |
| Baseline                      | 60.9 ± 19.5                       |                     |                              |                                       | 64.1 ± 20.9           |                     |                              |                                 |
| 3 months                      | 32.6 ± 20.4                       | -28.3 ± 18.2        | -21.5 ( -67.5 - -11.5)       | 0.0234                                | 33.1 ± 9.4            | -31 ± 20            | -30 ( -56 - -8)              | 0.799                           |
| 6 months                      | 25 ± 16.9                         | -35.9 ± 22.4        | -38 ( -67.5 - 1.5)           | 0.0234                                | 38.6 ± 13.6           | -25.5 ± 19.6        | -26.5 ( -48.5 - -0.5)        | 0.552                           |
| 12 months                     | 22.8 ± 22.4                       | -38.1 ± 18.6        | -37.5 ( -67 - -12.5)         | 0.0234                                | 33.3 ± 17.8           | -30.9 ± 23.2        | -26.8 ( -62.5 - -7.5)        | 0.445                           |
| PRWE responder (11.5 points)  |                                   |                     |                              |                                       |                       |                     |                              |                                 |
| 3 months                      | 8 (100)                           |                     |                              |                                       | 3 (75)                |                     |                              | 1.000                           |
| 6 months                      | 7 (87.5)                          |                     |                              |                                       | 3 (75)                |                     |                              | 1.000                           |
| 12 months                     | 8 (100)                           |                     |                              |                                       | 3 (75)                |                     |                              | 1.000                           |

Median of absolute change from baseline. Adjusted P value: Wilcoxon signed rank test with Stepdown Bonferroni correction. Test of Binomial proportion (p=0.5).

**Supplementary Table S4:** Clinical measures over the 12 months post treatment by localization

|                                      |           | RC patient n=8  |                         |                              | Test of Change<br>from baseline | RC+MC patients<br>n=4     |                         |                              | Comparison<br>Between<br>groups |
|--------------------------------------|-----------|-----------------|-------------------------|------------------------------|---------------------------------|---------------------------|-------------------------|------------------------------|---------------------------------|
|                                      |           | Mean $\pm$ SD   | Mean<br>Change $\pm$ SD | Median Change<br>(min – max) | Adjusted<br>p-value             | Mean $\pm$ SD or n<br>(%) | Mean Change<br>$\pm$ SD | Median Change<br>(min – max) | Adjusted<br>p-value             |
| Wrist strength (kg)<br>injured wrist | Baseline  | 27.9 $\pm$ 10.3 |                         |                              |                                 | 21.9 $\pm$ 7.7            |                         |                              |                                 |
|                                      | 3 months  | 32.2 $\pm$ 12.1 | 4.3 $\pm$ 3.1           | 4.3 ( -1 - 8.7)              | 0.023                           | 25.2 $\pm$ 5.4            | 3.3 $\pm$ 2.8           | 4.2 ( -0.7 - 5.3)            | 0.799                           |
|                                      | 6 months  | 37.8 $\pm$ 11.5 | 9.9 $\pm$ 6             | 9.7 ( 1 - 20)                | 0.023                           | 24.5 $\pm$ 9.4            | 2.6 $\pm$ 5.6           | 2 ( -2.3 - 8.7)              | 0.075                           |
|                                      | 12 months | 38.5 $\pm$ 11.6 | 10.5 $\pm$ 7.3          | 8 ( 2.3 - 24)                | 0.023                           | 25.8 $\pm$ 10.4           | 3.8 $\pm$ 3.4           | 3 ( 0.7 - 8.7)               | 0.148                           |
| normal wrist                         | Baseline  | 40.3 $\pm$ 14.2 |                         |                              |                                 | 35.8 $\pm$ 10.6           |                         |                              |                                 |
|                                      | 3 months  | 44.1 $\pm$ 13.8 | 3.8 $\pm$ 4.7           | 2.3 ( -0.7 - 13.3)           | 0.094                           | 36 $\pm$ 8.3              | 0.2 $\pm$ 2.7           | 0.3 ( -3.3 - 3.3)            | 0.234                           |
|                                      | 6 months  | 46 $\pm$ 14.6   | 5.8 $\pm$ 3.9           | 5.7 ( -0.7 - 12.7)           | 0.047                           | 36 $\pm$ 9.1              | 0.2 $\pm$ 7.6           | 0.7 ( -8.7 - 8)              | 0.268                           |
|                                      | 12 months | 48.2 $\pm$ 12.4 | 5 $\pm$ 5.8             | 3.3 ( -1.3 - 15.3)           | 0.094                           | 37.3 $\pm$ 11.4           | 1.5 $\pm$ 1.8           | 1.7 ( -0.7 - 3.3)            | 0.298                           |

Median of absolute change from baseline. Adjusted P value: Wilcoxon signed rank test with Stepdown Bonferroni correction
